# Supplementary material for: Promises and Challenges of Predictive Blood Biomarkers for Locally Advanced Rectal Cancer Treated with Neoadjuvant Chemoradiotherapy
Source: MDPI journal article supplement (doi:10.3390/cells12030413), 2023-01-26
Supplement: s1 [file s1]

## Supplementary Material

**Table S1.** Overview of the studies on predictive value of circulating biomarker in LARC.

| Study articles              |            |                    |                                |                  |                 |                                                              |                                                                      |                                                                                                   |
|-----------------------------|------------|--------------------|--------------------------------|------------------|-----------------|--------------------------------------------------------------|----------------------------------------------------------------------|---------------------------------------------------------------------------------------------------|
| authors                     | study year | number of patients | treatment type                 | radiation dosage | time to surgery | blood sampling time                                          | measured biomarker                                                   | tumor response endpoint                                                                           |
| Yang <i>et al.</i> [1]      | 2000-2009  | 137                | 5-FU based CRT                 | 45Gy             | 3.4-12.4 weeks  | <i>pre</i> -CRT/<br><i>post</i> -CRT                         | CEA                                                                  | pCR                                                                                               |
| Kim <i>et al.</i> [2]       | 2003-2011  | 314                | 5-FU based CRT                 | 45-50Gy          | 6-8 weeks       | <i>pre</i> -CRT /<br><i>post</i> -CRT                        | CEA / CA 19-9 / thrombocytes                                         | TRG (Dworak)                                                                                      |
| Choi <i>et al.</i> [3]      | 2007-2012  | 53                 | 5-FU based CRT                 | 45-63Gy          | 6-8 weeks       | <i>pre</i> -CRT                                              | CEA / Hb                                                             | pCR                                                                                               |
| Heo <i>et al.</i> [4]       | 2010-2013  | 52                 | 5-FU based CRT                 | 44-45Gy          | 4-8 weeks       | <i>pre</i> -CRT /<br>during-CRT<br>/<br><i>post</i> -CRT     | leukocytes / lymphocytes / Hb /<br>CEA                               | pCR                                                                                               |
| Jung <i>et al.</i> [5]      | 2005-2013  | 984                | 5-FU based CRT                 | 45-50Gy          | 6-8 weeks       | <i>pre</i> -CRT                                              | NLR / PLR / LMR                                                      | TRG<br>(Gastrointestinal<br>Pathology Study<br>Group of the<br>Korean Society<br>of Pathologists) |
| Yang <i>et al.</i> [6]      | 2014-2017  | 531                | n/a                            | N/A              | 5-12 weeks      | <i>Pre</i> -CRT /<br><i>post</i> -CRT                        | CEA / CA19-9 / Hb                                                    | pCR                                                                                               |
| Cheong <i>et al.</i> [7]    | 2011-2017  | 145                | 5-FU based CRT                 | 50.4Gy           | 6-8 weeks       | <i>Pre</i> -CRT /<br><i>post</i> -CRT                        | CEA / NLR / PLR                                                      | TRG (AJCC)                                                                                        |
| Engel <i>et al.</i> [8]     | 2010-2018  | 331                | 5-FU or Capecitabine based CRT | 45-50.4Gy        | 1-70 weeks      | <i>pre</i> -CRT                                              | CEA                                                                  | pCR                                                                                               |
| Huang <i>et al.</i> [9]     | 2011-2017  | 236                | 5-FU based CRT                 | 45-50.4Gy        | n/a             | <i>pre</i> -CRT<br>/<br><i>post</i> -CRT                     | CEA / leukocytes / Hb                                                | pCR (ypT0N0)                                                                                      |
| Gago <i>et al.</i> [10]     | 2012-2017  | 89                 | 5-FU based CRT                 | 45Gy             | n/a             | <i>pre</i> -CRT                                              | CEA                                                                  | TRG (Mandard)                                                                                     |
| Guo <i>et al.</i> [11]      | 2007-2018  | 751                | Capectiabine based CRT         | 46-50Gy          | 6-8 weeks       | <i>pre</i> -CRT                                              | Serum lipids: apoAI, CEA, CA 19-9, TC, TG, HDL-c, LDL-c, apoB        | TRG (Mandard)                                                                                     |
| Zhang <i>et al.</i> [12]    | 2008-2018  | 432                | Capectiabine based CRT         | 50Gy             | 6-8 weeks       | <i>pre</i> -CRT /<br><i>post</i> -CRT                        | CEA                                                                  | pCR                                                                                               |
| Berardi <i>et al.</i> [13]  | 1996-2003  | 317                | 5-FU based CRT or RT alone     | n/a              | 4-6 weeks       | <i>pre</i> -CRT,<br><i>post</i> -CRT<br><i>post</i> -Surgery | Hb                                                                   | Downstaging                                                                                       |
| Song <i>et al.</i> [14]     | 2007-2016  | 674                | 5-FU or Capecitabine based CRT | 45-50.4 Gy       | 6-8 weeks       | <i>pre</i> -CRT /<br><i>post</i> -CRT                        | CEA / CA 19-9                                                        | Downstaging /<br>pCR                                                                              |
| Yeo <i>et al.</i> [15]      | 2009-2013  | 260                | 5-FU or Capecitabine based CRT | 45 Gy            | n/a             | <i>pre</i> -CRT                                              | CEA / CA 19-9 / Hb                                                   | Downstaging /<br>pCR                                                                              |
| Restivo <i>et al.</i> [16]  | 1995-2010  | 260                | 5-FU or Capecitabine based CRT | 45 Gy            | minimum 4 weeks | <i>post</i> -CRT                                             | CEA                                                                  | pCR                                                                                               |
| Jang <i>et al.</i> [17]     | 2004-2009  | 109                | 5-FU or Capecitabine based CRT | 45 Gy            | 6-9 weeks       | <i>pre</i> -CRT /<br><i>post</i> -CRT                        | CEA / Hb                                                             | TRG (Dworak)                                                                                      |
| Cai <i>et al.</i> [18]      | 2010-2017  | 284                | 5-FU or Capecitabine based CRT | 46-50.4Gy        | n/a             | <i>pre</i> -CRT/<br><i>post</i> -CRT                         | CEA / CA 19-9                                                        | TRG (NCCN) /<br>Downstaging                                                                       |
| Hu <i>et al.</i> [19]       | 2014-2015  | 149                | 5-FU or Capecitabine based CRT | 46-50.4Gy        | n/a             | <i>pre</i> -CRT/<br>during-CRT/<br><i>post</i> CRT           | CEA                                                                  | pCR / TRG                                                                                         |
| Kitayama <i>et al.</i> [20] | 2004-2009  | 73                 | 5-FU based CRT                 | 50.4 Gy          | n/a             | <i>Pre</i> -CRT /<br><i>Post</i> -CRT                        | CEA / thrombocytes / lymphocytes                                     | pCR                                                                                               |
| Sawada <i>et al.</i> [21]   | 2005-2014  | 267                | 5-FU based CRT                 | 45-50.4 Gy       | n/a             | <i>pre</i> -CRT                                              | CEA / LCR/LMR/NLR/PNI/ CRP to albumin ratio?/<br>NxCRP/MxCRP/NAR/NxM | TRG (Dworak)                                                                                      |

|                               |           |     |                                   |                    |            |                                                                 |                                                             |                                     |
|-------------------------------|-----------|-----|-----------------------------------|--------------------|------------|-----------------------------------------------------------------|-------------------------------------------------------------|-------------------------------------|
| Tawfik <i>et al.</i> [22]     | 2000-2015 | 98  | 5-FU based CRT                    | 45-50Gy            | n/a        | <i>pre</i> -CRT /<br><i>post</i> -CRT                           | LMR/PLR/NLR/NAR / albumin/<br>CEA / Hb / thrombocytes / WBC | pCR                                 |
| Krauthamer <i>et al.</i> [23] | 2002-2007 | 140 | 5-FU based CRT                    | 44Gy               | 6-8 weeks  | <i>pre</i> -CRT                                                 | Albumin /Hb / NLR / Thrombocytes                            | pCR                                 |
| Aires <i>et al.</i> [24]      | 2013-2019 | 171 | 5-FU or Capecitabine based CRT    | 45-55Gy            | n/a        | <i>pre</i> -CRT                                                 | CRP / CEA / CA 19-9 / Hb /<br>Thrombocytes / NLR            | TRG (Ryan)                          |
| Dreyer <i>et al.</i> [25]     | 1999-2010 | 79  | 5-FU or Capecitabine based CRT    | 39.6-50Gy          | n/a        | <i>pre</i> -CRT                                                 | mGPS / CEA / Hb / NLR / PLR                                 | TRG (Rödel)                         |
| Agostini <i>et al.</i> [26]   | 1998-2008 | 67  | 5-FU based CRT                    | 50Gy               | 4-8 weeks  | <i>pre</i> -CRT /<br><i>post</i> -CRT                           | cfDNA                                                       | TRG (Mandard)                       |
| Zitt <i>et al.</i> [27]       | N/A       | 26  | 5-FU based CRT                    | 45Gy               | n/a        | <i>Pre</i> -CRT/<br><i>post</i> -CRT/<br><i>post</i> -Surgery   | cfDNA                                                       | yp Stage                            |
| Sun <i>et al.</i> [28]        | N/A       | 34  | Capecitabine based CRT            | 50Gy               | 6-8 weeks  | <i>pre</i> -CRT /<br><i>post</i> -CRT                           | cfDNA / KRAS mutation / MGMT<br>promoter metyhlation        | TRG (Dworak)                        |
| Carpinetti <i>et al.</i> [29] | N/A       | 4   | 5-FU based CRT                    | 50.4-54Gy          | n/a        | <i>pre</i> -CRT /<br>during-CRT / <i>post</i> -CRT              | ctDNA                                                       | TRG (Dworak)                        |
| Sclafani <i>et al.</i> [30]   | N/A       | 97  | Capecitabine based CRT            | 50.4Gy             | 4-6 weeks  | <i>pre</i> -CRT                                                 | ctDNA / KRAS and BRAF mutation                              | CR (Recist 1.1)                     |
| Tie <i>et al.</i> [31]        | 2012-2015 | 159 | 5-FU based CRT                    | n/a                | n/a        | <i>pre</i> -CRT /<br><i>post</i> -CRT /<br><i>post</i> -Surgery | ctDNA                                                       | TRG (Dworak)                        |
| Shalaby <i>et al.</i> [32]    | N/A       | 93  | Capecitabine based CRT            | 50.4Gy             | 6 weeks    | <i>pre</i> -CRT                                                 | cfDNA, MGMT / ERCC 1 promoter<br>methylation                | TRG (Dworak)                        |
| Schou <i>et al.</i> [33]      | 2009-2014 | 123 | Capecitabine based CRT            | 54Gy               | 6-8 weeks  | <i>pre</i> -CRT /<br><i>post</i> -CRT                           | cfDNA                                                       | pCR                                 |
| Appelt <i>et al.</i> [34]     | 2005-2008 | 146 | 5-FU based CRT                    | 50.4Gy             | 8 weeks    | <i>pre</i> -CRT                                                 | methylation of NPY gene in ctDNA                            | TRG (Mandard)                       |
| Khakoo <i>et al.</i> [35]     | 2015-2016 | 47  | Capecitabine based CRT            | 50.4-54Gy          | n/a        | <i>pre</i> -CRT /<br>during CRT<br>/ <i>post</i> -CRT           | ctDNA                                                       | mrTRG (MRI) or<br>TRG (Mandard)     |
| Pazdirek <i>et al.</i> [36]   | 2013-2017 | 36  | Capecitabine based CRT            | 50.4Gy             | 8-10 weeks | <i>pre</i> -CRT /<br><i>post</i> -CRT                           | ctDNA                                                       | TRG (dworak)                        |
| Murahashi <i>et al.</i> [37]  | 2017-2018 | 85  | 5FU or Capecitabine based CRT     | 50.4Gy<br>or 25 Gy | n/a        | <i>pre</i> -CRT /<br><i>post</i> -CRT /<br><i>post</i> -Surgery | ctDNA / CEA                                                 | TNM / TRG<br>(Dworak)               |
| Zhou <i>et al.</i> [38]       | 2017-2019 | 104 | Capecitabine based CRT            | 45-50Gy            | 8 weeks    | <i>pre</i> -CRT /<br>during-CRT<br>/ <i>post</i> -CRT           | ctDNA                                                       | TNM / TRG<br>(CAP)                  |
| McDuff <i>et al.</i> [39]     | 2014-2018 | 29  | 5-FU based CRT                    | 50.4Gy             | n/a        | <i>pre</i> -CRT /<br><i>post</i> -CRT                           | ctDNA                                                       | pCR                                 |
| Wada <i>et al.</i> [40]       |           | 106 | 5-FU or capecitabine based CRT    | 45-50.4Gy          | n/a        | <i>pre</i> -CRT                                                 | miRNA / CEA                                                 | TRG (Mandard)                       |
| Azizian <i>et al.</i> [41]    | 2011-2012 | 42  | 5-FU based CRT                    | not specified      | 4 weeks    | <i>pre</i> -CRT /<br>during-CRT<br>/ <i>post</i> -CRT           | miRNA                                                       | Lymph node<br>negativity            |
| D'Angelo <i>et al.</i> [42]   | 2007-2011 | 34  | 5-FU or Capecitabine based CRT    | at least 45Gy      | n/a        | <i>pre</i> -CRT                                                 | miRNA                                                       | TRG (Mandard)                       |
| Hiyoshi <i>et al.</i> [43]    | 2013-2016 | 94  | n/a                               | 50.4Gy             | 4-8 weeks  | <i>pre</i> -CRT                                                 | miRNA                                                       | TRG (Dworak)                        |
| Yu <i>et al.</i> [44]         | 2006-2015 | 87  | n/a                               | 50-50.4Gy          | 6-8 weeks  | <i>pre</i> -CRT                                                 | miRNA                                                       | TRG (Mandard)                       |
| Meltzers <i>et al.</i> [45]   | 2013-2015 | 29  | Capecitabine based CRT<br>or SCRT | 25 or 50 Gy        | n/a        | <i>pre</i> -CRT                                                 | Exosomal miRNA                                              | TRG (CAP) or<br>TRG<br>(Bouzourene) |
| Baek <i>et al.</i> [46]       | 2012-2015 | 89  | 5-FU or Capecitabine based CRT    | 45-504Gy           | 6-8 weeks  | <i>pre</i> -CRT                                                 | miRNA                                                       | TRG (Rödel)                         |

|                            |     |     |                |           |     |     |                      |           |
|----------------------------|-----|-----|----------------|-----------|-----|-----|----------------------|-----------|
| Dreussi <i>et al.</i> [47] | N/A | 265 | 5-FU based CRT | 50.4-55Gy | n/a | n/a | SNP related to miRNA | pCR / TRG |
|----------------------------|-----|-----|----------------|-----------|-----|-----|----------------------|-----------|

Legend : 5-FU : 5-fluorouracil, apoA1 : apolipoprotein A1, apoB : apolipoprotein B, CA 19-9 : carbohydrate antigen 19-9, CEA: carcinoembryonic antigen, cfDNA : cell free DNA, ctDNA : circulating tumor DNA, CRT : chemoradiotherapy, CAP : college of american pathologists, CR : complete response, CRP : c-reactive protein, Hb : hemoglobin, HDL-c : high-density lipoprotein cholesterol, LDL-c : low-density lipoprotein cholesterol, LCR : lymphocyte to CRP ratio, LMR : lymphocyte to monocyte ratio, mrTRG : magnetic resonance tumor regression grade, miRNA : micro RNA, mGPS : modified Glasgow prognostic score, MxCRP : monocyte x CRP product NAR : neutrophil to albumin ratio, NLR : neutrophile to lymphocyte ratio, NxCRP : neutrophil x CRP product, NxM : neutrophile x monocyte product, n/a : not available, pCR : pathological complete response, PLR: latelet to lymphocyte ratio, SNP : single nucleotide polymorphism, TG : triglyceride, TC : total cholesterol, TRG: tumor regression grade.

**Table S2.** Studies exploring CA19-9 as a biomarker predictive of tumor regression following CRT.

| Study                             | Cut-off   | N   | Measured outcome     | Sn    | Sp    | VPP   | VPN   | p.value<br>(Univariate) |
|-----------------------------------|-----------|-----|----------------------|-------|-------|-------|-------|-------------------------|
| <i>pre-CRT</i>                    |           |     |                      |       |       |       |       |                         |
| Aires <i>et al.</i> [24]          | 3.5 U/ml  | 171 | TRG 0-1<br>(Rayan)   | 39.6% | 72.5% | n/a   | n/a   | ns                      |
| Yeo <i>et al.</i> [15]            | 9 U/ml    | 260 | ypStage 0-1          | 70.2% | 50%   | 44.3% | 74.8% | <0.01(*)                |
|                                   | 10 U/ml   | 260 | ypStage 0-1          | 74.5% | 48.2% | 44.9% | 76.9% | <0.01                   |
| Song <i>et al.</i> [14]           | 12.6 U/ml | 674 | Downstaging          | 62%   | 54.5% | 52.9% | 63.4% | 0.0001                  |
| Guo <i>et al.</i> [11]            | 35 U/ml   | 751 | TRG 1-2<br>(Mandard) | n/a   | n/a   | n/a   | n/a   | ns                      |
| Kim <i>et al.</i> [2]             | 37 U/ml   | 314 | pCR                  | 86.5% | 21.5% | 13.7% | 91.7% | ns                      |
| Yang <i>et al.</i> [6]            | 37 U/ml   | 531 | pCR                  | 85%   | 24.8% | 20.8% | 87.7% | ns                      |
| Cai <i>et al.</i> [18]            | 37 U/ml   | 284 | TRG 0-1<br>(NCCN)    | 93.6% | 97.7% | 39.6% | 70.8% | ns                      |
| <i>post-CRT &amp; pre-surgery</i> |           |     |                      |       |       |       |       |                         |
| Song <i>et al.</i> [14]           | 11.3 U/ml | 674 | Downstaging          | 58%   | 49.1% | 48.5% | 58.6% | ns                      |
| <i>pre- and post CRT ratio</i>    |           |     |                      |       |       |       |       |                         |
| Song <i>et al.</i> [14]           | 0.92      | 674 | pCR                  | 44.9% | 66.7% | 25.4% | 82.7% | 0.012                   |
|                                   | 1.28      | 674 | Downstaging          | 73.1% | 41.7% | 50.9% | 65.3% | <0.0001(*)              |
| <i>reduction ratio</i>            |           |     |                      |       |       |       |       |                         |
| Yang <i>et al.</i> [6]            | n/a       | 531 | pCR                  | n/a   | n/a   | n/a   | n/a   | ns                      |

(\*) : also significant in multivariate analysis. Legend : CRT : chemoradiotherapy, NCCN : national comprehensive cancer network, NPV : negative predictive value, ns : non-significant, n/a : not available, N : number of patients, pCR : pathological complete response, yp Stage : pathological stage after neo-adjuvant treatment, PPV : positive predictive value, Sn : sensitivity, Sp : specificity, TRG : tumor regression grade.

**Table S3.** Studies exploring hemoglobin level as a biomarker predictive of tumor regression following CRT.

| Study                             | Cut-off                      | N   | Measure outcome    | Sn    | Sp    | VPP   | VPN   | p. value<br>(Univariate) |
|-----------------------------------|------------------------------|-----|--------------------|-------|-------|-------|-------|--------------------------|
| <i>pre-CRT</i>                    |                              |     |                    |       |       |       |       |                          |
| Yang J. <i>et al.</i> [6]         | 9 g/dl                       | 531 | pCR                | 97%   | 5.6%  | 19.2% | 88.9% | ns                       |
| Choi <i>et al.</i> [3]            | 10 g/dl                      | 53  | pCR                | 90.9% | 14.3% | 21.7% | 85.7% | ns                       |
| Krauthamer <i>et al.</i> [23]     | 12 g/dl                      | 140 | pCR                | 63.6% | 51%   | 36.8% | 75.8% | ns                       |
| Berardi <i>et al.</i> [13]        | 12 g/dl                      | 317 | Downstaging        | n/a   | n/a   | n/a   | n/a   | 0.05                     |
| Aires <i>et al.</i> [24]          | 12.2g/dl                     | 171 | TRG 0-1<br>(Rayan) | 81.4% | 39.1% | n/a   | n/a   | 0.0036                   |
| Yeo <i>et al.</i> [15]            | 12.5 g/dl                    | 260 | Yp Stage<br>0-1    | 59.8% | 48.2% | 39%   | 68.4% | ns                       |
| Heo <i>et al.</i> [4]             | 13.2 g/dl                    | 52  | pCR                | 35.7% | 40.5% | 18.5% | 62.5% | ns                       |
| Jang <i>et al.</i> [17]           | 13.5 g/dl                    | 109 | TRG 3-4 (Dworak)   | 42.2% | 54.7% | 39.6% | 57.4% | ns                       |
| Tawfik <i>et al.</i> [22]         | n/a                          | 98  | pCR                | n/a   | n/a   | n/a   | n/a   | 0.05                     |
| Dreyer <i>et al.</i> [25]         | 13 g/dl (M)<br>11.5 g/dl (F) | 79  | TRG 3-4<br>(Rödel) | 64.7% | 46.5% | 48.9% | 62.5% | ns                       |
| <i>during CRT</i>                 |                              |     |                    |       |       |       |       |                          |
| Huang <i>et al.</i> [9]           | 10 g/dl                      | 236 | pCR                | 83.9% | 32.8% | 28%   | 86.8% | 0.0159(*)                |
| <i>post-CRT &amp; pre-surgery</i> |                              |     |                    |       |       |       |       |                          |
| Tawfik <i>et al.</i> [22]         | n/a                          | 98  | pCR                | n/a   | n/a   | n/a   | n/a   | ns                       |

(\*) : also significant in multivariate analysis. Legend : CRT : chemoradiotherapy, NPV : negative predictive value, ns : non-significant, n/a : not available, N : number of patients, pCR : pathological complete response, yp Stage : pathological stage after neo-adjuvant treatment, PPV : positive predictive value, Sn : sensitivity, Sp : specificity, TRG : tumor regression grade.

**Table S4.** Studies exploring albumin or CRP levels as biomarkers predictive of tumor regression following CRT.

[illegible]

|                           |                            |     |                    |       |       |       |     |            |
|---------------------------|----------------------------|-----|--------------------|-------|-------|-------|-----|------------|
| Tawfik <i>et al.</i> [22] | n/a                        | 98  | pCR                | n/a   | n/a   | n/a   | n/a | ns         |
| CRP                       |                            |     |                    |       |       |       |     |            |
| <i>pre</i> -CRT           |                            |     |                    |       |       |       |     |            |
| Aires <i>et al.</i> [24]  | 3.5 mg/L                   | 171 | TRG 0-1<br>(Rayan) | 54.8% | 93.5% | n/a   | n/a | <0.0001(*) |
| mGPS                      |                            |     |                    |       |       |       |     |            |
| Dreyer <i>et al.</i> [25] | mGPS 0<br>(vs mGPS<br>1-2) | 79  | TRG 3-4<br>(Rödel) | 88%   | 44.7% | 51.1% | 85% | 0.022(*)   |

(\*) : also significant in multivariate analysis. Legend : CRT : chemoradiotherapy, NPV : negative predictive value, ns : non-significant, n/a : not available, N : number of patients, pCR : pathological complete response, PPV : positive predictive value, Sn : sensitivity, Sp : specificity, TRG : tumor regression grade.

**Table S5.** Studies exploring leukocyte and lymphocyte counts as well as NLR, NAR, LMR and PLR ratios as biomarkers predictive of tumor regression following CRT.

| Study                                                               | Cut-off   | N   | Measure outcome | Sn    | Sp    | VPP   | VPN   | p value<br>(univariate) |
|---------------------------------------------------------------------|-----------|-----|-----------------|-------|-------|-------|-------|-------------------------|
| leukocyte Count                                                     |           |     |                 |       |       |       |       |                         |
| <i>pre</i> -CRT                                                     |           |     |                 |       |       |       |       |                         |
| Heo <i>et al.</i> [4]                                               | 7.3 G/l   | 52  | pCR             | 83.3% | 45.7% | 34.5% | 88.9% | ns                      |
| Tawfik <i>et al.</i> [22]                                           | n/a       | 98  | pCR             | n/a   | n/a   | n/a   | n/a   | ns                      |
| <i>post</i> -CRT <i>pre</i> -surgery                                |           |     |                 |       |       |       |       |                         |
| Tawfik <i>et al.</i> [22]                                           | n/a       | 98  | pCR             | n/a   | n/a   | n/a   | n/a   | ns                      |
| during CRT                                                          |           |     |                 |       |       |       |       |                         |
| Huang <i>et al.</i> [9]                                             | 3 G/l     | 236 | pCR             | 51.8% | 36.3% | 20.3% | 70.1% | ns                      |
| lymphocytes                                                         |           |     |                 |       |       |       |       |                         |
| <i>pre</i> -CRT                                                     |           |     |                 |       |       |       |       |                         |
| Kitayama <i>et al.</i> [20]                                         | n/a       | 73  | pCR             | n/a   | n/a   | n/a   | n/a   | 0.02(*)                 |
| Heo <i>et al.</i> [4]                                               | 1.996 G/l | 52  | pCR             | 42.9% | 47.4% | 23.1% | 75%   | ns                      |
| during treatment ( <i>post</i> -4 weeks)                            |           |     |                 |       |       |       |       |                         |
| Heo <i>et al.</i> [4]                                               | X         | 52  | pCR             | 42.9% | 47.4% | 23.1% | 75%   | ns                      |
| <i>post</i> -4 weeks lymphocytes/ <i>pre</i> -CRT lymphocytes ratio |           |     |                 |       |       |       |       |                         |
| Heo <i>et al.</i> [4]                                               | 0.35      | 52  | pCR             | 85.7% | 57.9% | 42.9% | 91.7% | 0.01(*)                 |
| during treatment ( <i>post</i> -8 weeks)                            |           |     |                 |       |       |       |       |                         |
| Heo <i>et al.</i> [4]                                               | X         | 52  | pCR             | 22.2% | 64.3% | 16.7% | 72%   | ns                      |

| post-8 weeks lymphocytes/pre-CRT lymphocytes ratio  |           |     |                           |       |       |       |       |          |
|-----------------------------------------------------|-----------|-----|---------------------------|-------|-------|-------|-------|----------|
| Heo <i>et al.</i> [4]                               | 0.47      | 52  | pCR                       | 33.3% | 53.6% | 18.8% | 71.4% | ns       |
| during treatment ( <i>post</i> -12 weeks)           |           |     |                           |       |       |       |       |          |
| Heo <i>et al.</i> [4]                               | 1.033 G/l | 52  | pCR                       | 66.7% | 26.1% | 26.1% | 66.7% | ns       |
| post-12 weeks lymphocytes/pre-CRT lymphocytes ratio |           |     |                           |       |       |       |       |          |
| Heo <i>et al.</i> [4]                               | 0.53      | 52  | pCR                       | 55.6% | 47.8% | 29.4% | 73.3% | ns       |
| neutrophil to lymphocyte ratio (NLR)                |           |     |                           |       |       |       |       |          |
| pre-CRT                                             |           |     |                           |       |       |       |       |          |
| Jung <i>et al.</i> [5]                              | 1.7       | 984 | TRG<br>(total-near total) | 47.2% | 57.5% | 44.7% | 59.9% | ns       |
| Aires <i>et al.</i> [24]                            | 2.3       | 171 | TRG 0-1<br>(Rayan)        | 51%   | 58%   | n/a   | n/a   | ns       |
| Cheong <i>et al.</i> [7]                            | 2.8       | 145 | pCR                       | n/a   | n/a   | n/a   | n/a   | 0.013(*) |
| Krauthamer <i>et al.</i> [23]                       | 5         | 140 | pCR                       | 77.3% | 40.8% | 37%   | 80%   | ns       |
| Dreyer <i>et al.</i> [25]                           | 5         | 79  | TRG 3-4<br>(Rödel)        | 91.4% | 25%   | 49.2% | 78.6% | ns       |
| Sawada <i>et al.</i> [21]                           | n/a       | 267 | TRG 3-4<br>(Dworak)       | n/a   | n/a   | n/a   | n/a   | ns       |
| Tawfik <i>et al.</i> [22]                           | n/a       | 98  | pCR                       | n/a   | n/a   | n/a   | n/a   | 0.012    |
| post-CRT                                            |           |     |                           |       |       |       |       |          |
| Tawfik <i>et al.</i> [22]                           | n/a       | 98  | pCR                       | n/a   | n/a   | n/a   | n/a   | ns       |
| neutrophil to albumin ratio (NAR)                   |           |     |                           |       |       |       |       |          |
| pre-CRT                                             |           |     |                           |       |       |       |       |          |
| Sawada <i>et al.</i> [21]                           | n/a       | 267 | TRG 3-4<br>(Dworak)       | n/a   | n/a   | n/a   | n/a   | ns       |
| Tawfik <i>et al.</i> [22]                           | n/a       | 98  | pCR                       | n/a   | n/a   | n/a   | n/a   | 0.002(*) |
| post-CRT                                            |           |     |                           |       |       |       |       |          |
| Tawfik <i>et al.</i> [22]                           | n/a       | 98  | pCR                       | n/a   | n/a   | n/a   | n/a   | 0.05     |
| lymphocyte to monocyte ratio (LMR)                  |           |     |                           |       |       |       |       |          |
| pre-CRT                                             |           |     |                           |       |       |       |       |          |
| Sawada <i>et al.</i> [21]                           | n/a       | 267 | TRG 3-4<br>(Dworak)       | n/a   | n/a   | n/a   | n/a   | ns       |
| Tawfik <i>et al.</i> [22]                           | n/a       | 98  | pCR                       | n/a   | n/a   | n/a   | n/a   | ns       |
| Jung <i>et al.</i> [5]                              | 6.8       | 984 | TRG<br>(total-near total) | 12.2% | 86.3% | 44.7% | 58.2% | ns       |
| post-CRT pre-Surgery                                |           |     |                           |       |       |       |       |          |

|                                                        |           |     |                           |       |       |       |       |          |
|--------------------------------------------------------|-----------|-----|---------------------------|-------|-------|-------|-------|----------|
| Tawfik <i>et al.</i> [22]                              | n/a       | 98  | pCR                       | n/a   | n/a   | n/a   | n/a   | ns       |
| platelet to lymphocyte ratio (PLR)                     |           |     |                           |       |       |       |       |          |
| <i>pre-CRT</i>                                         |           |     |                           |       |       |       |       |          |
| Jung <i>et al.</i> [5]                                 | 92.88     | 984 | TRG<br>(total-near total) | 20.2% | 75.7% | 37.8% | 56.6% | ns       |
| Cheong <i>et al.</i> [7]                               | 138.2     | 145 | pCR                       | n/a   | n/a   | n/a   | n/a   | n/a      |
| Dreyer <i>et al.</i> [25]                              | 300       | 79  | TRG 3-4<br>(Rödel)        | 88.6% | 27.3% | 49.2% | 75%   | ns       |
| Tawfik <i>et al.</i> [22]                              | n/a       | 98  | pCR                       | n/a   | n/a   | n/a   | n/a   | ns       |
| <i>post-CRT</i>                                        |           |     |                           |       |       |       |       |          |
| Tawfik <i>et al.</i> [22]                              | n/a       | 98  | pCR                       | n/a   | n/a   | n/a   | n/a   | ns       |
| neutrophil and monocyte product (N x M) <i>pre-CRT</i> |           |     |                           |       |       |       |       |          |
| Sawada <i>et al.</i> [21]                              | 1,440,000 | 267 | TRG 3-4<br>(Dworak)       | n/a   | n/a   | n/a   | n/a   | 0.001(*) |
| lymphocyte to CRP ratio (LCR) ( <i>pre-CRT</i> )       |           |     |                           |       |       |       |       |          |
| Sawada <i>et al.</i> [21]                              | 18.141    | 267 | TRG 3-4<br>(Dworak)       | n/a   | n/a   | n/a   | n/a   | 0.007(*) |

(\*) : also significant in multivariate analysis. Legend : CRT : chemoradiotherapy, NPV : negative predictive value, ns : non-significant, n/a : not available, N : number of patients, pCR : pathological complete response, PPV : positive predictive value, Sn : sensitivity, Sp : specificity, TRG : tumor regression grade.

1. Yang, K.L.; Yang, S.H.; Liang, W.Y.; Kuo, Y.J.; Lin, J.K.; Lin, T.C.; Chen, W.S.; Jiang, J.K.; Wang, H.S.; Chang, S.C.; et al. Carcinoembryonic antigen (CEA) level, CEA ratio, and treatment outcome of rectal cancer patients receiving pre-operative chemoradiation and surgery. *Radiat Oncol* **2013**, *8*, 43, doi:10.1186/1748-717X-8-43.
2. Kim, H.J.; Choi, G.S.; Park, J.S.; Park, S.; Kawai, K.; Watanabe, T. Clinical significance of thrombocytosis before preoperative chemoradiotherapy in rectal cancer: predicting pathologic tumor response and oncologic outcome. *Ann Surg Oncol* **2015**, *22*, 513-519, doi:10.1245/s10434-014-3988-8.
3. Choi, E.; Kim, J.H.; Kim, O.B.; Kim, M.Y.; Oh, Y.K.; Baek, S.G. Predictors of pathologic complete response after preoperative concurrent chemoradiotherapy of rectal cancer: a single center experience. *Radiat Oncol J* **2016**, *34*, 106-112, doi:10.3857/roj.2015.01585.
4. Heo, J.; Chun, M.; Noh, O.K.; Oh, Y.T.; Suh, K.W.; Park, J.E.; Cho, O. Sustaining Blood Lymphocyte Count during Preoperative Chemoradiotherapy as a Predictive Marker for Pathologic Complete Response in Locally Advanced Rectal Cancer. *Cancer Res Treat* **2016**, *48*, 232-239, doi:10.4143/crt.2014.351.
5. Jung, S.W.; Park, I.J.; Oh, S.H.; Yeom, S.S.; Lee, J.L.; Yoon, Y.S.; Kim, C.W.; Lim, S.B.; Lee, J.B.; Yu, C.S.; et al. Association of immunologic markers from complete blood counts with the response to preoperative chemoradiotherapy and prognosis in locally advanced rectal cancer. *Oncotarget* **2017**, *8*, 59757-59765, doi:10.18632/oncotarget.15760.
6. Yang, J.; Ling, X.; Tang, W.; Hu, D.; Zhou, H.; Yin, G. Analyses of predictive factors for pathological complete remission in neoadjuvant therapy for locally advanced rectal cancer. *J BUON* **2019**, *24*, 77-83.
7. Cheong, C.; Shin, J.S.; Suh, K.W. Prognostic value of changes in serum carcinoembryonic antigen levels for preoperative chemoradiotherapy response in locally advanced rectal cancer. *World J Gastroenterol* **2020**, *26*, 7022-7035, doi:10.3748/wjg.v26.i44.7022.
8. Engel, R.M.; Oliva, K.; Koulis, C.; Yap, R.; McMurrick, P.J. Predictive factors of complete pathological response in patients with locally advanced rectal cancer. *Int J Colorectal Dis* **2020**, *35*, 1759-1767, doi:10.1007/s00384-020-03633-8.
9. Huang, C.M.; Huang, C.W.; Ma, C.J.; Yeh, Y.S.; Su, W.C.; Chang, T.K.; Tsai, H.L.; Juo, S.H.; Huang, M.Y.; Wang, J.Y. Predictive Value of FOLFOX-Based Regimen, Long Interval, Hemoglobin Levels and Clinical Negative Nodal Status, and Postchemoradiotherapy CEA Levels for Pathological Complete Response in Patients with Locally Advanced Rectal Cancer after Neoadjuvant Chemoradiotherapy. *J Oncol* **2020**, *2020*, 9437684, doi:10.1155/2020/9437684.
10. Gago, T.; Caldeira, P.; Cunha, A.C.; Campelo, P.; Guerreiro, H. Can we optimize CEA as a response marker in rectal cancer? *Rev Esp Enferm Dig* **2021**, *113*, 423-428, doi:10.17235/reed.2020.7321/2020.
11. Guo, S.P.; Chen, C.; Zeng, Z.F.; Wang, Q.X.; Jiang, W.; Gao, Y.H.; Chang, H. Serum Apolipoprotein A-I Predicts Response of Rectal Cancer to Neoadjuvant Chemoradiotherapy. *Cancer Manag Res* **2021**, *13*, 2623-2631, doi:10.2147/CMAR.S302677.
12. Zhang, Q.; Liang, J.; Chen, J.; Mei, S.; Wang, Z. Predictive Factors for Pathologic Complete Response Following Neoadjuvant Chemoradiotherapy for Rectal Cancer. *Asian Pac J Cancer Prev* **2021**, *22*, 1607-1611, doi:10.31557/APJCP.2021.22.5.1607.
13. Berardi, R.; Braconi, C.; Mantello, G.; Scartozzi, M.; Del Prete, S.; Luppi, G.; Martinelli, R.; Fumagalli, M.; Valeri, G.; Bearzi, I.; et al. Anemia may influence the outcome of patients undergoing neo-adjuvant treatment of rectal cancer. *Ann Oncol* **2006**, *17*, 1661-1664, doi:10.1093/annonc/mdl285.
14. Song, J.; Huang, X.; Chen, Z.; Chen, M.; Lin, Q.; Li, A.; Chen, Y.; Xu, B. Predictive value of carcinoembryonic antigen and carbohydrate antigen 19-9 related to downstaging to stage 0-I after neoadjuvant chemoradiotherapy in locally advanced rectal cancer. *Cancer Manag Res* **2018**, *10*, 3101-3108, doi:10.2147/CMAR.S166417.
15. Yeo, S.G.; Kim, D.Y.; Kim, T.H.; Kim, S.Y.; Baek, J.Y.; Chang, H.J.; Park, J.W.; Oh, J.H. Carbohydrate antigen 19-9 levels associated with pathological responses to preoperative chemoradiotherapy in rectal cancer. *Asian Pac J Cancer Prev* **2014**, *15*, 5383-5387, doi:10.7314/apjcp.2014.15.13.5383.
16. Restivo, A.; Zorcolo, L.; Cocco, I.M.; Manunza, R.; Margiani, C.; Marongiu, L.; Casula, G. Elevated CEA levels and low distance of the tumor from the anal verge are predictors of incomplete response to chemoradiation in patients with rectal cancer. *Ann Surg Oncol* **2013**, *20*, 864-871, doi:10.1245/s10434-012-2669-8.
17. Jang, N.Y.; Kang, S.B.; Kim, D.W.; Kim, J.H.; Lee, K.W.; Kim, I.A.; Kim, J.S. The role of carcinoembryonic antigen after neoadjuvant chemoradiotherapy in patients with rectal cancer. *Dis Colon Rectum* **2011**, *54*, 245-252, doi:10.1007/DCR.0b013e3181fcee68.
18. Cai, Z.; Huang, L.; Chen, Y.; Xie, X.; Zou, Y.; Lan, P.; Wu, X. CEA Decline Predicts Tumor Regression and Prognosis in Locally Advanced Rectal Cancer Patients with Elevated Baseline CEA. *J Cancer* **2020**, *11*, 6565-6570, doi:10.7150/jca.49252.
19. Hu, H.; Huang, J.; Lan, P.; Wang, L.; Huang, M.; Wang, J.; Deng, Y. CEA clearance pattern as a predictor of tumor response to neoadjuvant treatment in rectal cancer: a post-hoc analysis of FOWARC trial. *BMC Cancer* **2018**, *18*, 1145, doi:10.1186/s12885-018-4997-y.
20. Kitayama, J.; Yasuda, K.; Kawai, K.; Sunami, E.; Nagawa, H. Circulating lymphocyte number has a positive association with tumor response in neoadjuvant chemoradiotherapy for advanced rectal cancer. *Radiat Oncol* **2010**, *5*, 47, doi:10.1186/1748-717X-5-47.
21. Sawada, R.; Akiyoshi, T.; Kitagawa, Y.; Hiyoshi, Y.; Mukai, T.; Nagasaki, T.; Yamaguchi, T.; Konishi, T.; Yamamoto, N.; Ueno, M.; et al. Systemic Inflammatory Markers Combined with Tumor-Infiltrating Lymphocyte Density for the Improved Prediction of Response to Neoadjuvant Chemoradiotherapy in Rectal Cancer. *Ann Surg Oncol* **2021**, *28*, 6189-6198, doi:10.1245/s10434-021-09975-z.



22. Tawfik, B.; Mokdad, A.A.; Patel, P.M.; Li, H.C.; Huerta, S. The neutrophil to albumin ratio as a predictor of pathological complete response in rectal cancer patients following neoadjuvant chemoradiation. *Anticancer Drugs* **2016**, *27*, 879-883, doi:10.1097/CAD.0000000000000411.
23. Krauthamer, M.; Rouvinov, K.; Ariad, S.; Man, S.; Walfish, S.; Pinsk, I.; Sztarker, I.; Charkovsky, T.; Lavrenkov, K. A study of inflammation-based predictors of tumor response to neoadjuvant chemoradiotherapy for locally advanced rectal cancer. *Oncology* **2013**, *85*, 27-32, doi:10.1159/000348385.
24. Aires, F.; Rodrigues, D.; Lamas, M.P.; Herdeiro, M.T.; Figueiras, A.; Oliveira, M.J.; Marques, M.; Pinto, A.T. C-Reactive Protein as Predictive Biomarker for Response to Chemoradiotherapy in Patients with Locally Advanced Rectal Cancer: A Retrospective Study. *Cancers (Basel)* **2022**, *14*, doi:10.3390/cancers14030491.
25. Dreyer, S.B.; Powell, A.G.; McSorley, S.T.; Waterston, A.; Going, J.J.; Edwards, J.; McMillan, D.C.; Horgan, P.G. The Pretreatment Systemic Inflammatory Response is an Important Determinant of Poor Pathologic Response for Patients Undergoing Neoadjuvant Therapy for Rectal Cancer. *Ann Surg Oncol* **2017**, *24*, 1295-1303, doi:10.1245/s10434-016-5684-3.
26. Agostini, M.; Pucciarelli, S.; Enzo, M.V.; Del Bianco, P.; Briarava, M.; Bedin, C.; Maretto, I.; Friso, M.L.; Lonardi, S.; Mescoli, C.; et al. Circulating cell-free DNA: a promising marker of pathologic tumor response in rectal cancer patients receiving preoperative chemoradiotherapy. *Ann Surg Oncol* **2011**, *18*, 2461-2468, doi:10.1245/s10434-011-1638-y.
27. Zitt, M.; Muller, H.M.; Rochel, M.; Schwendinger, V.; Zitt, M.; Goebel, G.; Devries, A.; Margreiter, R.; Oberwalder, M.; Zeillinger, R.; et al. Circulating cell-free DNA in plasma of locally advanced rectal cancer patients undergoing preoperative chemoradiation: a potential diagnostic tool for therapy monitoring. *Dis Markers* **2008**, *25*, 159-165, doi:10.1155/2008/598071.
28. Sun, W.; Sun, Y.; Zhu, M.; Wang, Z.; Zhang, H.; Xin, Y.; Jiang, G.; Guo, X.; Zhang, Z.; Liu, Y. The role of plasma cell-free DNA detection in predicting preoperative chemoradiotherapy response in rectal cancer patients. *Oncol Rep* **2014**, *31*, 1466-1472, doi:10.3892/or.2013.2949.
29. Carpinetti, P.; Donnard, E.; Bettoni, F.; Asprino, P.; Koyama, F.; Rozanski, A.; Sabbaga, J.; Habr-Gama, A.; Parmigiani, R.B.; Galante, P.A.; et al. The use of personalized biomarkers and liquid biopsies to monitor treatment response and disease recurrence in locally advanced rectal cancer after neoadjuvant chemoradiation. *Oncotarget* **2015**, *6*, 38360-38371, doi:10.18632/oncotarget.5256.
30. Sclafani, F.; Chau, I.; Cunningham, D.; Hahne, J.C.; Vlachogiannis, G.; Eltahir, Z.; Lampis, A.; Braconi, C.; Kalaitzaki, E.; De Castro, D.G.; et al. KRAS and BRAF mutations in circulating tumour DNA from locally advanced rectal cancer. *Sci Rep* **2018**, *8*, 1445, doi:10.1038/s41598-018-19212-5.
31. Tie, J.; Cohen, J.D.; Wang, Y.; Li, L.; Christie, M.; Simons, K.; Elsaleh, H.; Kosmider, S.; Wong, R.; Yip, D.; et al. Serial circulating tumour DNA analysis during multimodality treatment of locally advanced rectal cancer: a prospective biomarker study. *Gut* **2019**, *68*, 663-671, doi:10.1136/gutjnl-2017-315852.
32. Shalaby, S.M.; El-Shal, A.S.; Abdelaziz, L.A.; Abd-Elbary, E.; Khairy, M.M. Promoter methylation and expression of DNA repair genes MGMT and ERCC1 in tissue and blood of rectal cancer patients. *Gene* **2018**, *644*, 66-73, doi:10.1016/j.gene.2017.10.056.
33. Schou, J.V.; Larsen, F.O.; Sorensen, B.S.; Abrantes, R.; Boysen, A.K.; Johansen, J.S.; Jensen, B.V.; Nielsen, D.L.; Spindler, K.L. Circulating cell-free DNA as predictor of treatment failure after neoadjuvant chemo-radiotherapy before surgery in patients with locally advanced rectal cancer. *Ann Oncol* **2018**, *29*, 610-615, doi:10.1093/annonc/mdx778.
34. Appelt, A.L.; Andersen, R.F.; Lindebjerg, J.; Jakobsen, A. Prognostic Value of Serum NPY Hypermethylation in Neoadjuvant Chemoradiotherapy for Rectal Cancer: Secondary Analysis of a Randomized Trial. *Am J Clin Oncol* **2020**, *43*, 9-13, doi:10.1097/COC.0000000000000609.
35. Khakoo, S.; Carter, P.D.; Brown, G.; Valeri, N.; Picchia, S.; Bali, M.A.; Shaikh, R.; Jones, T.; Begum, R.; Rana, I.; et al. MRI Tumor Regression Grade and Circulating Tumor DNA as Complementary Tools to Assess Response and Guide Therapy Adaptation in Rectal Cancer. *Clin Cancer Res* **2020**, *26*, 183-192, doi:10.1158/1078-0432.CCR-19-1996.
36. Pazdirek, F.; Minarik, M.; Benesova, L.; Halkova, T.; Belsanova, B.; Macek, M.; Stepanek, L.; Hoch, J. Monitoring of Early Changes of Circulating Tumor DNA in the Plasma of Rectal Cancer Patients Receiving Neoadjuvant Concomitant Chemoradiotherapy: Evaluation for Prognosis and Prediction of Therapeutic Response. *Front Oncol* **2020**, *10*, 1028, doi:10.3389/fonc.2020.01028.
37. Murahashi, S.; Akiyoshi, T.; Sano, T.; Fukunaga, Y.; Noda, T.; Ueno, M.; Zembutsu, H. Serial circulating tumour DNA analysis for locally advanced rectal cancer treated with preoperative therapy: prediction of pathological response and postoperative recurrence. *Br J Cancer* **2020**, *123*, 803-810, doi:10.1038/s41416-020-0941-4.
38. Zhou, J.; Wang, C.; Lin, G.; Xiao, Y.; Jia, W.; Xiao, G.; Liu, Q.; Wu, B.; Wu, A.; Qiu, H.; et al. Serial Circulating Tumor DNA in Predicting and Monitoring the Effect of Neoadjuvant Chemoradiotherapy in Patients with Rectal Cancer: A Prospective Multicenter Study. *Clin Cancer Res* **2021**, *27*, 301-310, doi:10.1158/1078-0432.CCR-20-2299.
39. McDuff, S.G.R.; Hardiman, K.M.; Ulintz, P.J.; Parikh, A.R.; Zheng, H.; Kim, D.W.; Lennerz, J.K.; Hazar-Rethinam, M.; Van Seventer, E.E.; Fetter, I.J.; et al. Circulating Tumor DNA Predicts Pathologic and Clinical Outcomes Following Neoadjuvant Chemoradiation and Surgery for Patients With Locally Advanced Rectal Cancer. *JCO Precis Oncol* **2021**, *5*, doi:10.1200/PO.20.00220.
40. Wada, Y.; Shimada, M.; Morine, Y.; Ikemoto, T.; Saito, Y.; Zhu, Z.; Wang, X.; Etxart, A.; Park, Y.; Bujanda, L.; et al. Circulating miRNA Signature Predicts Response to Preoperative Chemoradiotherapy in Locally Advanced Rectal Cancer. *JCO Precis Oncol* **2021**, *5*, doi:10.1200/PO.21.00015.

41. Azizian, A.; Kramer, F.; Jo, P.; Wolff, H.A.; Beissbarth, T.; Skarupke, R.; Bernhardt, M.; Grade, M.; Ghadimi, B.M.; Gaedcke, J. Preoperative Prediction of Lymph Node Status by Circulating Mir-18b and Mir-20a During Chemoradiotherapy in Patients with Rectal Cancer. *World J Surg* **2015**, *39*, 2329-2335, doi:10.1007/s00268-015-3083-8.
42. D'Angelo, E.; Fassan, M.; Maretto, I.; Pucciarelli, S.; Zanon, C.; Digito, M.; Rugge, M.; Nitti, D.; Agostini, M. Serum miR-125b is a non-invasive predictive biomarker of the pre-operative chemoradiotherapy responsiveness in patients with rectal adenocarcinoma. *Oncotarget* **2016**, *7*, 28647-28657, doi:10.18632/oncotarget.8725.
43. Hiyoshi, Y.; Akiyoshi, T.; Inoue, R.; Murofushi, K.; Yamamoto, N.; Fukunaga, Y.; Ueno, M.; Baba, H.; Mori, S.; Yamaguchi, T. Serum miR-143 levels predict the pathological response to neoadjuvant chemoradiotherapy in patients with locally advanced rectal cancer. *Oncotarget* **2017**, *8*, 79201-79211, doi:10.18632/oncotarget.16760.
44. Yu, J.; Li, N.; Wang, X.; Ren, H.; Wang, W.; Wang, S.; Song, Y.; Liu, Y.; Li, Y.; Zhou, X.; et al. Circulating serum microRNA-345 correlates with unfavorable pathological response to preoperative chemoradiotherapy in locally advanced rectal cancer. *Oncotarget* **2016**, *7*, 64233-64243, doi:10.18632/oncotarget.11649.
45. Meltzer, S.; Bjornetro, T.; Lyckander, L.G.; Flatmark, K.; Dueland, S.; Samiappan, R.; Johansen, C.; Kalanxhi, E.; Ree, A.H.; Redalen, K.R. Circulating Exosomal miR-141-3p and miR-375 in Metastatic Progression of Rectal Cancer. *Transl Oncol* **2019**, *12*, 1038-1044, doi:10.1016/j.tranon.2019.04.014.
46. Baek, D.W.; Kim, G.; Kang, B.W.; Kim, H.J.; Park, S.Y.; Park, J.S.; Choi, G.S.; Kang, M.K.; Hur, K.; Kim, J.G. High expression of microRNA-199a-5p is associated with superior clinical outcomes in patients with locally advanced rectal cancer. *J Cancer Res Clin Oncol* **2020**, *146*, 105-115, doi:10.1007/s00432-019-03099-4.
47. Dreussi, E.; Pucciarelli, S.; De Paoli, A.; Polesel, J.; Canzonieri, V.; Agostini, M.; Friso, M.L.; Belluco, C.; Buonadonna, A.; Lonardi, S.; et al. Predictive role of microRNA-related genetic polymorphisms in the pathological complete response to neoadjuvant chemoradiotherapy in locally advanced rectal cancer patients. *Oncotarget* **2016**, *7*, 19781-19793, doi:10.18632/oncotarget.7757.
